# Supplementary material for: Reproductive toxicity and meiotic dysfunction following exposure to the pesticides Maneb, Diazinon and Fenarimol
Source: Royal Society of Chemistry journal article supplement (doi:10.1039/c4tx00141a), 2015-01-01

# Supplemental Figure 1

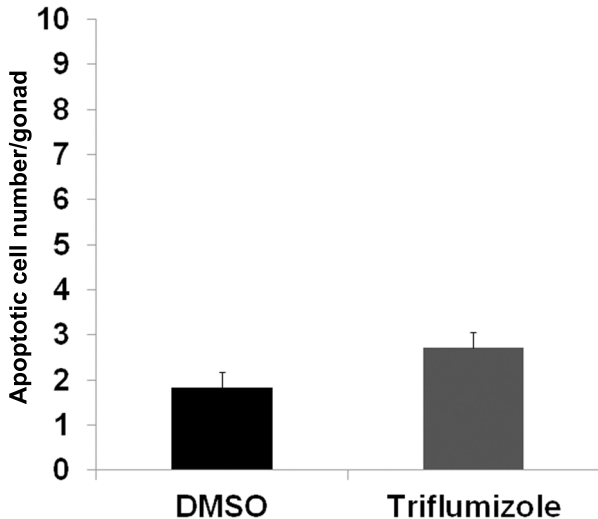

## Supplemental Figure 2

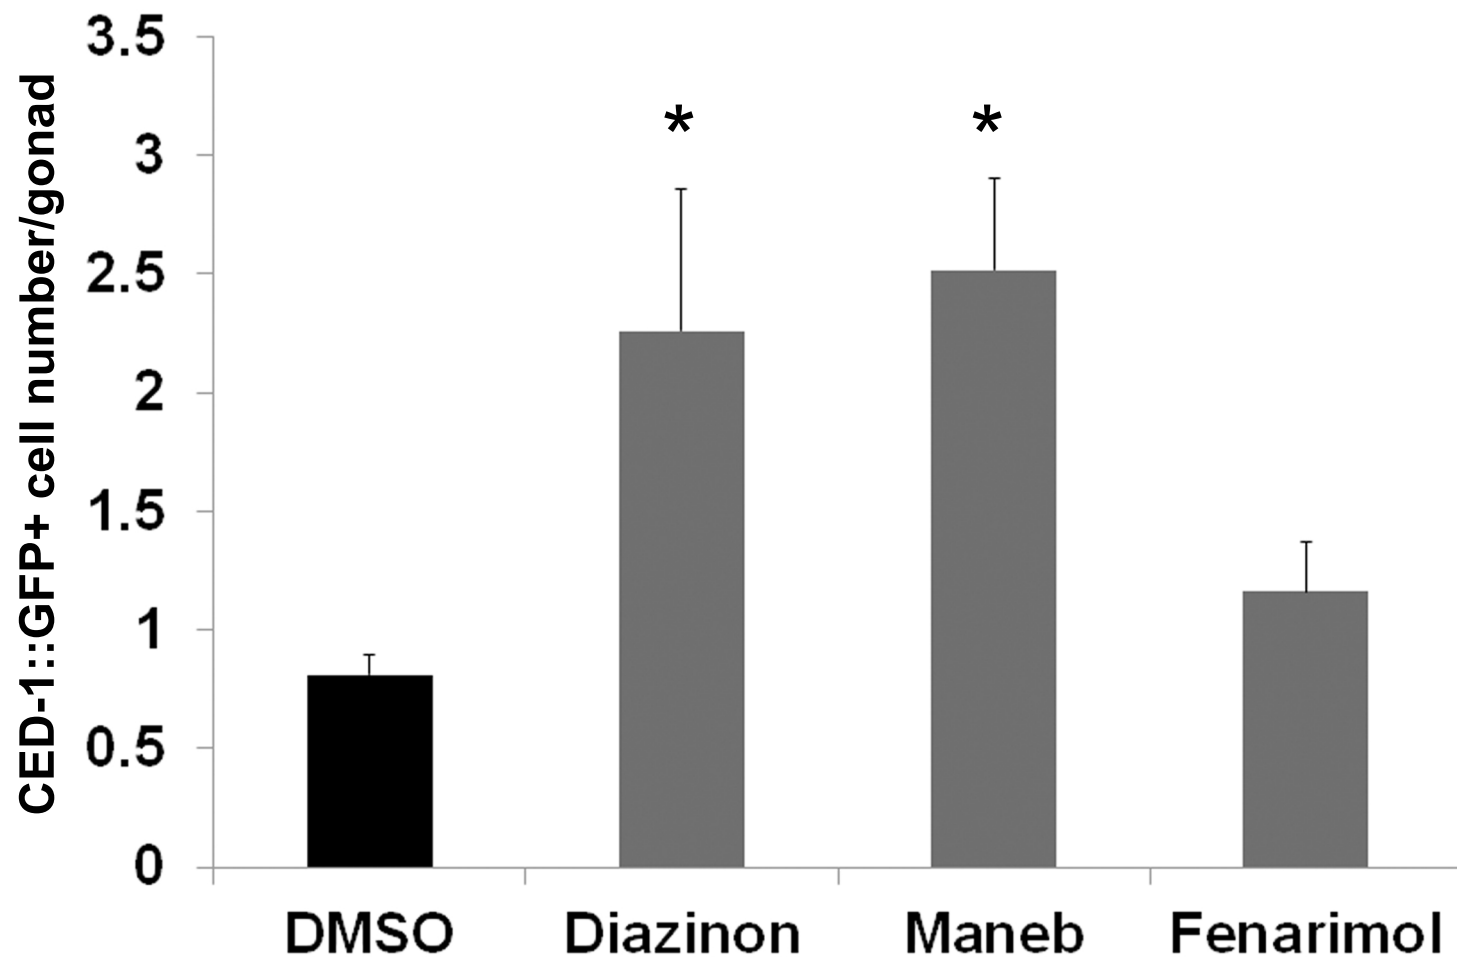

## Supplemental Figure 3

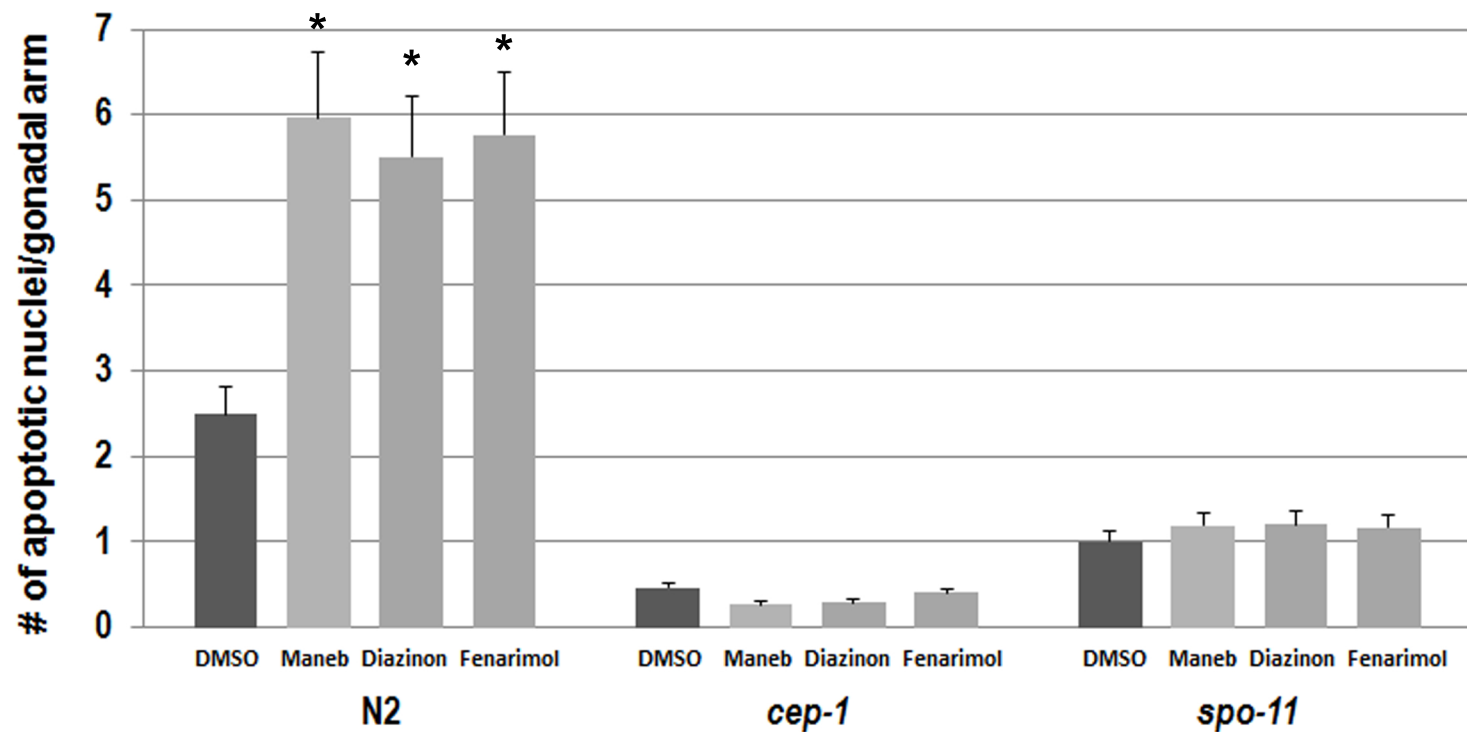

**Supplemental Figure 4**

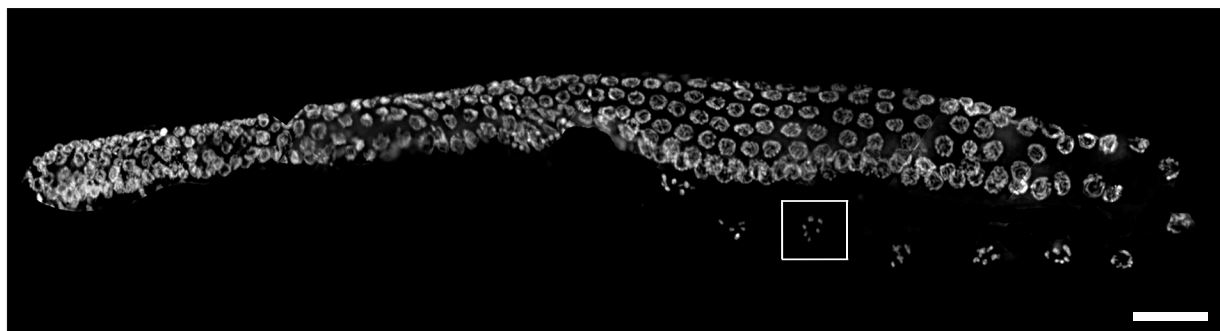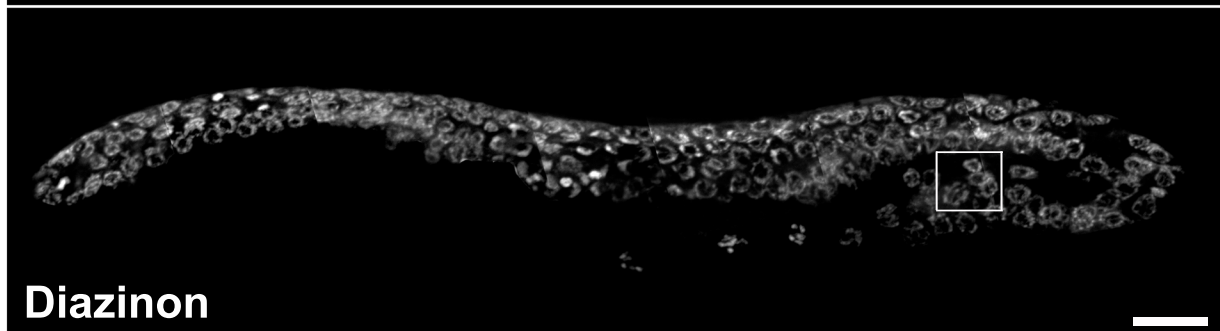

**Diazinon**

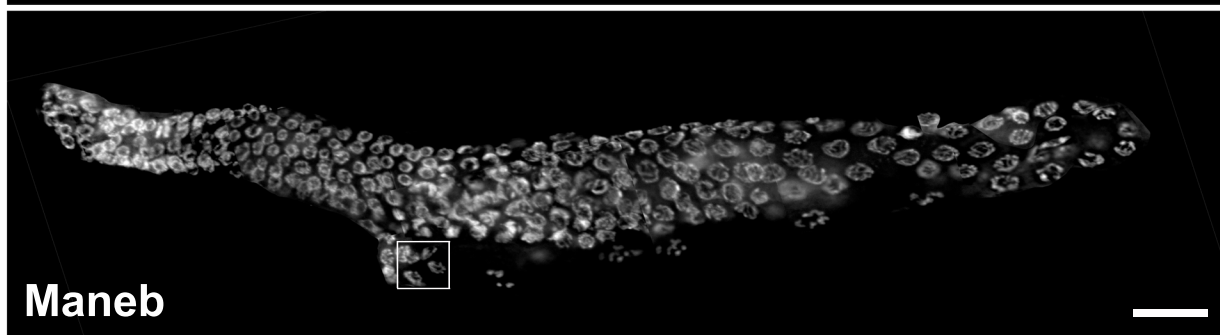

**Maneb**

**DMSO**

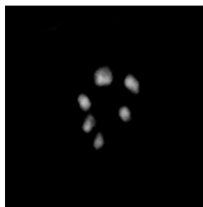

**Diazinon**

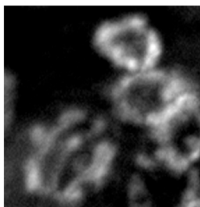

**Maneb**

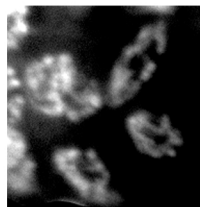

Supplement: c4tx00141a2.pdf [file c4tx00141a2.pdf]
